# Supplementary material
Source: Research Square preprint supplement (doi:10.21203/rs.3.rs-9716451/v1)
Supplement: Supplementary file 1 [file de4c50ea80ab969eb8b2970d.docx]

**SUPPLEMENTARY MATERIAL**

**Spatio-Temporal Dynamics of Land Use Land Cover and Future Projections in Nagavali River Basin**

**TABLE S1 — Full 7×7 Markov Transition Probability Matrix (2010→2024)**

Row = LULC class in 2010; Column = LULC class in 2024. Each value Tij represents the probability that a pixel of class i in 2010 transitions to class j by 2024. Row sums = 1.000 (valid probability distribution). Derived via QGIS MOLUSCE Plugin from observed pixel co-occurrence frequencies.

| **2010 → 2024** | **Water** | **Trees** | **Fl. Veg.** | **Crops** | **Built** | **Bare Grd** | **Rangeland** |
| --- | --- | --- | --- | --- | --- | --- | --- |
| Water | **0.768** | 0.012 | 0.031 | 0.061 | 0.008 | 0.086 | 0.034 |
| Trees | 0.003 | **0.842** | 0.001 | 0.021 | 0.002 | 0.001 | 0.130 |
| Fl. Veg. | 0.028 | 0.005 | 0.456 | 0.012 | 0.001 | 0.002 | 0.496 |
| Crops | 0.011 | 0.018 | 0.003 | **0.922** | 0.018 | 0.006 | 0.022 |
| Built | 0.004 | 0.002 | 0.000 | 0.048 | **0.930** | 0.004 | 0.012 |
| Bare Grd | 0.082 | 0.004 | 0.001 | 0.003 | 0.003 | **0.891** | 0.016 |
| Rangeland | 0.012 | 0.224 | 0.009 | 0.038 | 0.007 | 0.003 | **0.707** |

Green shading = persistence probability >0.700. Fl. Veg. = Flooded Vegetation; Fl. Grd = Bare Ground. Key transitions: Built Area persistence = 0.930 (irreversible); Rangeland→Trees = 0.224/decade (successional); Flooded Vegetation persistence = 0.456 (vulnerable).

**TABLE S2 — Class-Wise LULC Area Statistics and Net Change (2010–2024)**

| **LULC Class** | **Area 2010 (km²)** | **% 2010** | **Area 2024 (km²)** | **% 2024** | **Net Change (km²)** | **Change (%)** |
| --- | --- | --- | --- | --- | --- | --- |
| Water | 100.4 | 1.09 | 99.4 | 1.08 | **−1.0** | **−1.1** |
| Trees | 3,297.7 | 35.81 | 3,451.5 | 37.48 | **+153.8** | **+4.7** |
| Flooded Veg. | 13.2 | 0.14 | 9.6 | 0.10 | **−3.6** | **−27.4** |
| Crops | 3,015.1 | 32.74 | 3,101.8 | 33.68 | **+86.7** | **+2.9** |
| Built Area | 186.2 | 2.02 | 230.9 | 2.51 | **+44.6** | **+24.0** |
| Bare Ground | 10.6 | 0.11 | 7.2 | 0.08 | **−3.4** | **−32.1** |
| Rangeland | 2,586.9 | 28.09 | 2,309.8 | 25.08 | **−277.0** | **−10.7** |
| **TOTAL** | **9,210.1** | **100.00** | **9,210.2** | **100.00** | **—** | **—** |

**TABLE S3 — Statistical Summary of Eight Driving Factors**

| **Driving Factor** | **r (p-b)** | **Cohen d** | **MW r** | **RF Imp.** | **Resp. (%)** | **Direction** | **Rank** |
| --- | --- | --- | --- | --- | --- | --- | --- |
| Forest Fragmentation Index | +0.259 | +0.536 | 0.26 | 0.12 | 26.60% | Promotes change | **1** |
| Agricultural Encroachment | +0.233 | +0.480 | 0.06 | 0.09 | 20.50% | Promotes change | **2** |
| Slope | +0.094 | +0.189 | 0.13 | 0.06 | 13.30% | Promotes change | **3** |
| Elevation | +0.075 | +0.151 | 0.09 | 0.05 | 11.60% | Promotes change | **4** |
| Distance from River | +0.084 | +0.169 | 0.08 | 0.03 | 7.70% | Promotes change | **5** |
| Urban Expansion Intensity | +0.051 | +0.103 | 0.05 | 0.03 | 7.30% | Promotes change | **6** |
| Drainage Density | −0.053 | −0.106 | 0.08 | 0.03 | 6.80% | Constrains change | **7** |
| Floodplain Encroachment Risk | −0.152 | −0.307 | 0.09 | 0.02 | 6.00% | Constrains change | **8** |

*All factors significant at p < 0.001 (Mann–Whitney U test). r (p-b) = Point-Biserial Correlation; MW r = Mann–Whitney rank-sum effect size; RF Imp. = RF Permutation Importance raw score; Resp. = normalised responsibility percentage. Red shading = constraining factors with negative directionality.*

**TABLE S4 — CA–Markov Projected LULC Area (km²) by Decade (2010–2104)**

| **LULC Class** | **2010** | **2024** | **2044** | **2054** | **2064** | **2084** | **2094** | **2104** |
| --- | --- | --- | --- | --- | --- | --- | --- | --- |
| **Water** | 100.4 | 99.4 | 95.1 | 91.2 | 87.6 | 84.9 | 85.0 | 85.0 |
| **Trees** | 3,297.7 | 3,451.5 | 3,545.0 | 3,530.1 | 3,510.2 | 3,465.1 | 3,445.0 | 3,430.0 |
| **Flooded Veg.** | 13.2 | 9.6 | 8.1 | 7.5 | 7.0 | 6.1 | 5.9 | 5.7 |
| **Crops** | 3,015.1 | 3,101.8 | 3,192.0 | 3,235.0 | 3,271.0 | 3,330.0 | 3,344.0 | 3,358.0 |
| **Built Area** | 186.2 | 230.9 | 311.0 | 361.0 | 401.0 | 461.0 | 478.0 | 495.0 |
| **Bare Ground** | 10.6 | 7.2 | 5.5 | 5.0 | 4.5 | 4.0 | 4.0 | 4.0 |
| **Rangeland** | 2,586.9 | 2,309.8 | 2,052.0 | 1,980.0 | 1,929.0 | 1,858.0 | 1,847.0 | 1,832.0 |

2010 = observed baseline; 2024 = observed; 2044–2104 = CA–Markov BAU projections at decadal intervals. All values in km². Total basin area = 9,210 km². Fl. Veg. = Flooded Vegetation.

**TABLE S5 — Per-Class Accuracy Metrics: RF-Enhanced Validation (2024)**

| **LULC Class** | **PA (%)** | **UA (%)** | **F1 Score (%)** | **Commission Err. (%)** | **Key Observation** |
| --- | --- | --- | --- | --- | --- |
| Water | 65.8 | 71.9 | 68.7 | 28.1 | Spectrally confused with Bare Ground and shallow water bodies |
| Trees | 78.5 | 81.7 | 80.1 | 18.3 | Balanced, unbiased prediction profile — near 80% threshold |
| Flooded Veg. | 90.2 | 62.8 | 74.0 | 37.2 | High PA but low UA — over-predicted via wet Rangeland confusion |
| Crops | 72.4 | 87.5 | 79.3 | 12.5 | High UA; minor confusion with transitional Rangeland margins |
| Built Area | 97.9 | 93.0 | 95.4 | 7.0 | Highest accuracy — strong spectral contrast with all vegetated classes |
| Bare Ground | 85.4 | 45.5 | 59.3 | 54.5 | Severe commission error from Water (24 samples) and Rangeland (69) |
| Rangeland | 58.2 | 70.9 | 63.9 | 29.1 | Lowest PA — spectral ambiguity with dry forest and fallow cropland |

PA = Producer's Accuracy (recall). UA = User's Accuracy (precision). F1 = Harmonic mean of PA and UA. Commission Err. = 100 − UA. Green shading = both PA and UA ≥ 80%. Red shading = PA or UA below acceptable threshold. Overall Accuracy (OA) = 75.06%; Kappa (κ) = 0.7061; Cramér's V = 0.732.
